# Supplementary figures and images for: Perlecan domain 1 recombinant proteoglycan augments BMP-2 activity and osteogenesis
Source: Springer Nature journal article supplement (doi:10.1186/1472-6750-12-60), 2012-09-11

**A**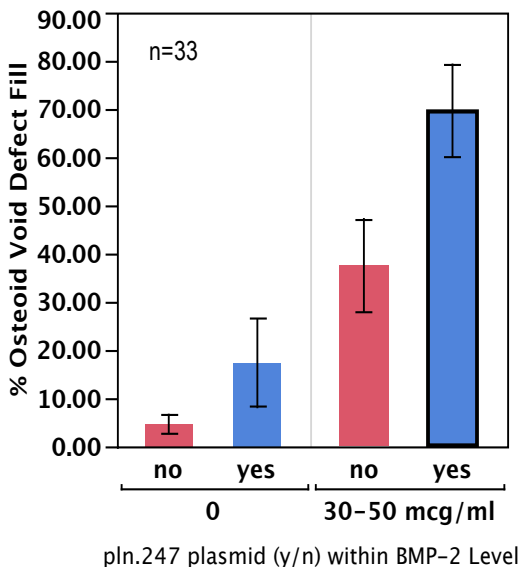**B**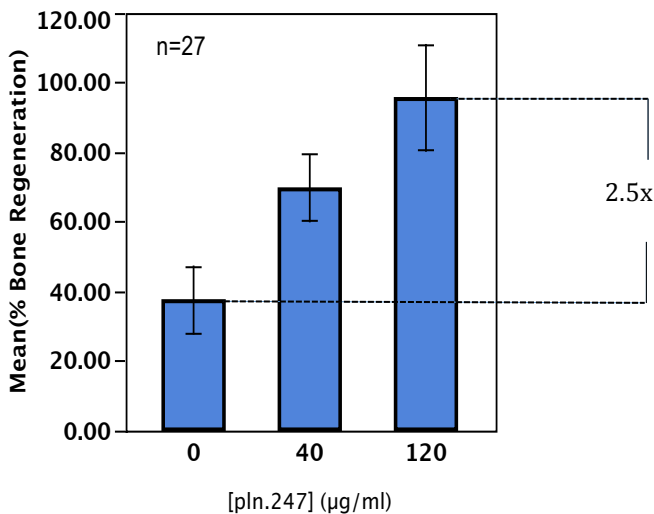

Supplement: 12896_2012_743_MOESM6_ESM.pdf [file 12896_2012_743_MOESM6_ESM.pdf]
